# Supplementary material for: Predicting the mean first passage time (MFPT) to reach any state for a passive dynamic walker with steady state variability
Source: PLOS journal article supplement (doi:10.1371/journal.pone.0207665), 2018-11-29
Supplement: S7 (10.1371/journal.pone.0207665.s007) [file journal.pone.0207665.s007]

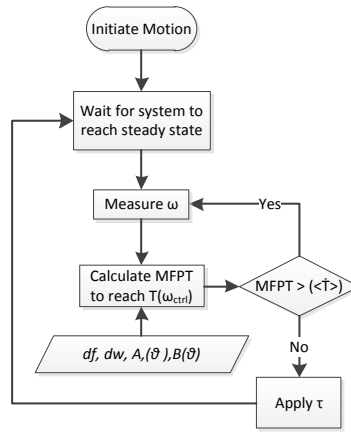

Figure S2: Flowchart of the MFPT based controller for the RW.
